# Supplementary material
Source: PubMed Central journal article supplement (PMC7868829)
Supplement: ajtr0013-0646-f7.pdf [file ajtr0013-0646-f7.pdf]

## The role of lncRNA-MEG in SCI

**Table S1.** Primer for qPCR

| Name              | Primer                 |
|-------------------|------------------------|
| Rat-miR-369-3P-F  | AGATCGACCGTGTATATTC    |
| Rat-miR-369-3P-R  | GAACATGTCTGCGTATCTC    |
| Rat-miR-128-3P-F  | CGGGGCCGTAGCACTGTC     |
| Rat-miR-128-3P-R  | GAACATGTCTGCGTATCTC    |
| Rat-miR-124-3P-F  | CGTGTTACAGCCGACCTTG    |
| Rat-miR-124-3P-R  | GAACATGTCTGCGTATCTC    |
| Rat-miR-376-3P-F  | GTGGATATCCTTCTATGTTT   |
| Rat-miR-376-3P-R  | GAACATGTCTGCGTATCTC    |
| Rat-miR-381-3P-F  | AGCGAGGTTGCCCTTGTAT    |
| Rat-miR-381-3P-R  | GAACATGTCTGCGTATCTC    |
| Rat-miR-494-3P-F  | AGGTTGTCCGTGTTGTCTTC   |
| Rat-miR-494-3P-R  | GAACATGTCTGCGTATCTC    |
| Rat-miR-434-3P-F  | AGCTCGACTCATGGTTTGAAC  |
| Rat-miR-434-3P-R  | GAACATGTCTGCGTATCTC    |
| Rat-miR-184-F     | TGGACGGAGAACTGATAAGG   |
| Rat-miR-184-R     | GAACATGTCTGCGTATCTC    |
| Rat-miR-215-F     | ATGACCTATGATTTGACAGAC  |
| Rat-miR-215-R     | GAACATGTCTGCGTATCTC    |
| Rat-miR-182-F     | GGCAATGGTAGAACTCACA    |
| Rat-miR-182-R     | GAACATGTCTGCGTATCTC    |
| Rat-miR-183-5P-F  | TATGGCACTGGTAGAATTCAC  |
| Rat-miR-183-5P-R  | GAACATGTCTGCGTATCTC    |
| Rat-miR-125a-5P-F | TCCCTGAGACCCTTTAACCT   |
| Rat-miR-125a-5P-R | GAACATGTCTGCGTATCTC    |
| Rat-miR-340-5P-F  | TTATAAAGCAATGAGACTGATT |
| Rat-miR-340-5P-R  | GAACATGTCTGCGTATCTC    |
| Rat-miR-300-3P-F  | TGAAGAGAGGTTATCCTTTG   |
| Rat-miR-300-3P-R  | GAACATGTCTGCGTATCTC    |
| Rat-miR-369-5P-F  | AGATCGACCGTGTATATTC    |
| Rat-miR-369-5P-R  | GAACATGTCTGCGTATCTC    |
| Rat-miR-300-5P-F  | AACCCGTAGATCCGAACCTTG  |
| Rat-miR-300-5P-R  | GAACATGTCTGCGTATCTC    |
| Rat-miR-542-3P-F  | CTCGGGGATCATCATGTCAC   |
| Rat-miR-542-3P-R  | GAACATGTCTGCGTATCTC    |
| Rat-miR-221-3P-F  | ACCTGGCATAAATGTAGA     |
| Rat-miR-221-3P-R  | GAACATGTCTGCGTATCTC    |
| Rat-miR-22-3P-F   | AGTTCTTCAGTGGAAGCT     |
| Rat-miR-22-3P-R   | GAACATGTCTGCGTATCTC    |
| Rat-miR-17-5P-F   | CAAAGTGCTTACAGTGCAGGT  |
| Rat-miR-17-5P-R   | GAACATGTCTGCGTATCTC    |
| Rat-miR-34c-5P-F  | AGGCAGTGTAGTTAGCTGATT  |
| Rat-miR-34c-5P-R  | GAACATGTCTGCGTATCTC    |
| Rat-miR-34b-5P-F  | AGGCAGTGTAAATTAGCTGAT  |
| Rat-miR-34b-5P-R  | GAACATGTCTGCGTATCTC    |
| Rat-miR-129-5P-F  | CTTTTTGCGGTCTGGGCTTG   |
| Rat-miR-129-5P-R  | GAACATGTCTGCGTATCTC    |
| Rat-miR-20a-5P-F  | AAAGTGCTTATAGTGCAGG    |
| Rat-miR-20a-5P-R  | GAACATGTCTGCGTATCTC    |

## The role of lncRNA-MEG in SCI

|                     |                           |
|---------------------|---------------------------|
| Rat-miR-193a-3P-F   | TCTTTGCGGGCGAGATG         |
| Rat-miR-193a-3P-R   | GAACATGTCTGCGTATCTC       |
| Rat-miR-140-3P-F    | CAGTGGTTTTACCTATGGT       |
| Rat-miR-140-3P-R    | GAACATGTCTGCGTATCTC       |
| Rat-miR-186-5P-F    | CAAAGAATTCTCCTTTTGGGC     |
| Rat-miR-186-5P-R    | GAACATGTCTGCGTATCTC       |
| Rat-miR-339-5P-F    | TCCCTGTCTCCAGGAGCTC       |
| Rat-miR-339-5P-R    | GAACATGTCTGCGTATCTC       |
| Rat-miR-322-5P-F    | AGCAGCAATTCATGTTTTGG      |
| Rat-miR-322-5P-R    | GAACATGTCTGCGTATCTC       |
| Rat-miR-23a-3P-F    | GGGGTTCCTGGGGATGGG        |
| Rat-miR-23a-3P-R    | GAACATGTCTGCGTATCTC       |
| Rat-miR-27a-3P-F    | AGGGCTTAGCTGCTTGAG        |
| Rat-miR-27a-3P-R    | GAACATGTCTGCGTATCTC       |
| Rat-miR-21-5P-F     | AGCTTATCAGACTGATGTTG      |
| Rat-miR-21-5P-R     | GAACATGTCTGCGTATCTC       |
| Rat-miR-146a-5P-F   | TGAGAACTGAATCCATGGG       |
| Rat-miR-146a-5P-R   | GAACATGTCTGCGTATCTC       |
| Rat-miR-146b-5P-F   | TGAGAACTGAATCCATAGGC      |
| Rat-miR-146b-5P-R   | GAACATGTCTGCGTATCTC       |
| Rat-lncRNA-MEG3-F   | CTGCCATCTACACCTCACG       |
| Rat-lncRNA-MEG3-R   | CTCTCCGCCGTCTGCGCTAGGGGCT |
| Human-lncRNA-MEG3-F | GCATTAAGCCCTGACCTTTG      |
| Human-lncRNA-MEG3-F | TCCAGTTTGCTAGCAGGTGA      |
| Human-mir-21-5p-F   | GCTTATCAGACTGATGTTG       |
| Human-mir-21-5p-R   | GAACATGTCTGCGTATCTC       |
| Human-PDCD4-F       | ACTGTGCCAACCAGTCCAAAGG    |
| Human-PDCD4-R       | CCTCCACATCATAACCTGTCC     |

---
